# Supplementary material for: Association between Quantitative Classification of Renal Surface Nodularity and Early Renal Injury in Patients with Arterial Hypertension
Source: Int J Hypertens. 2022 Mar 4;2022:1553700. doi: 10.1155/2022/1553700 (PMC8916879; doi:10.1155/2022/1553700)
Supplement: Supplementary Materials — Table S1: interrater agreement of quantitative classification of renal surface nodularity. Annex 1: clinical data and laboratory results of urea nitrogen and creatinine in patients with arterial hypertension. [file 1553700.f1.zip]

Archive with 2 entries (2 files):
- 1553700.f1/Annex1.docx
- 1553700.f1/tableS1.docx
